# Supplementary material for: Vertically aligned MoS2/MoOx heterojunction nanosheets for enhanced visible-light photocatalytic activity and photostability
Source: Royal Society of Chemistry journal article supplement (doi:10.1039/c4ce01169d), 2014-01-01
Supplement: c4ce01169d1.pdf [file c4ce01169d1.pdf]

## Supporting Information

### **Vertically Standing MoS<sub>2</sub>/MoO<sub>x</sub> Heterojunction Nanosheets for Enhanced Visible-Light Photocatalytic Active and Photostability**

Gang Zhou,<sup>a</sup> Xiaoyong Xu,<sup>\*ab</sup> Jianyu Yu,<sup>a</sup> Bin Feng,<sup>a</sup> Yu Zhang,<sup>a</sup> Jingguo Hu<sup>\*a</sup> and  
Yuxue Zhou<sup>a</sup>

<sup>a</sup>*College of Physics Science and Technology, Yangzhou University, Yangzhou 225002, China*

<sup>b</sup>*State Key Laboratory of Bioelectronics and School of Electronic Science and Engineering,  
Southeast University, Nanjing 210096, China*

\*Corresponding Authors:

E-mail: xxy@yzu.edu.cn (X. Xu) and jghu@yzu.edu.cn (J. Hu).

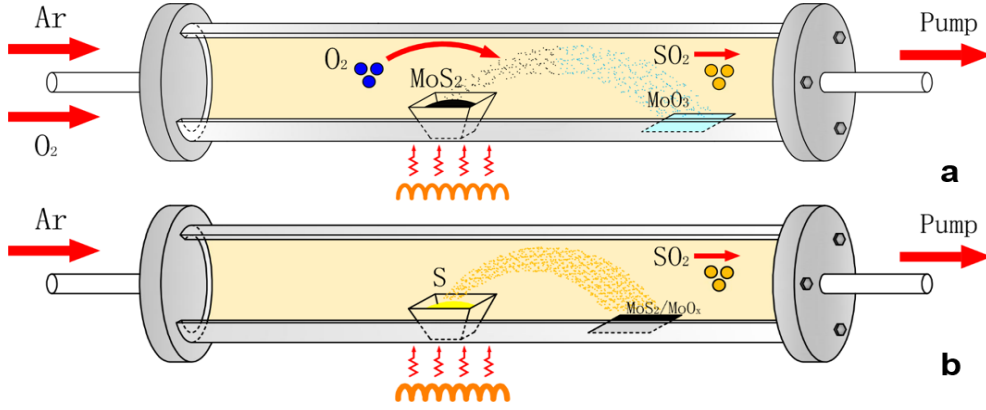

**Fig. S1** Schematic illustration for the two-step CVD process: (a) the synthesis of MoO<sub>3</sub> nanosheets and (b) the assembly of MoS<sub>2</sub> coverage by sulfurizing MoO<sub>3</sub> templates.

The vertically oriented MoO<sub>3</sub> nanosheets were synthesized by chemical vapor deposition (CVD), then the core-shell heterostructured nanosheets were obtained by sulfidizing MoO<sub>3</sub> templates. For the high temperature CVD method, the metallic source was evaporated at the high temperature region and then drifted to deposit onto a substrate at the lower temperature region under flowing argon/oxygen gas. Herein, the growth mechanism of the vertical MoO<sub>3</sub> nanosheets may be based on the vapor-solid (VS) mechanism.<sup>1</sup> In the VS mechanism, the size of MoO<sub>3</sub> nanosheets is proportional to time and growth rate which depend on evaporation rate and system pressure. Theoretically, the formation of wire/belt-like nanostructures can be explained by the kinetics of crystal growth via the 2D nucleation probability,<sup>2</sup> which is expressed as  $P_N = B \exp\left(-\frac{\pi\sigma^2}{k^2T^2 \ln(\alpha)}\right)$ , where  $P_N$  is a nucleation probability,  $B$  is a constant,  $\sigma$  is the surface energy of the solid whisker,  $k$  is the Boltzmann constant,  $T$  is the absolute temperature, and  $\alpha$  is the supersaturation ratio defined as  $\alpha = p/p_0$ ,

where  $p$  and  $p_0$  is respectively vapor pressure and equilibrium vapor pressure corresponding to temperature  $T$ . A higher temperature and larger supersaturation ratio induce the sheet-like structure. By comparison, lower temperature and smaller supersaturation ratio facilitate the growth of a wire/rod-like structure. The evaporation rate and the system pressure could have effect on the growth via the vapor pressure in terms of the supersaturation ratio as seen in the 2D nucleation probability equation.

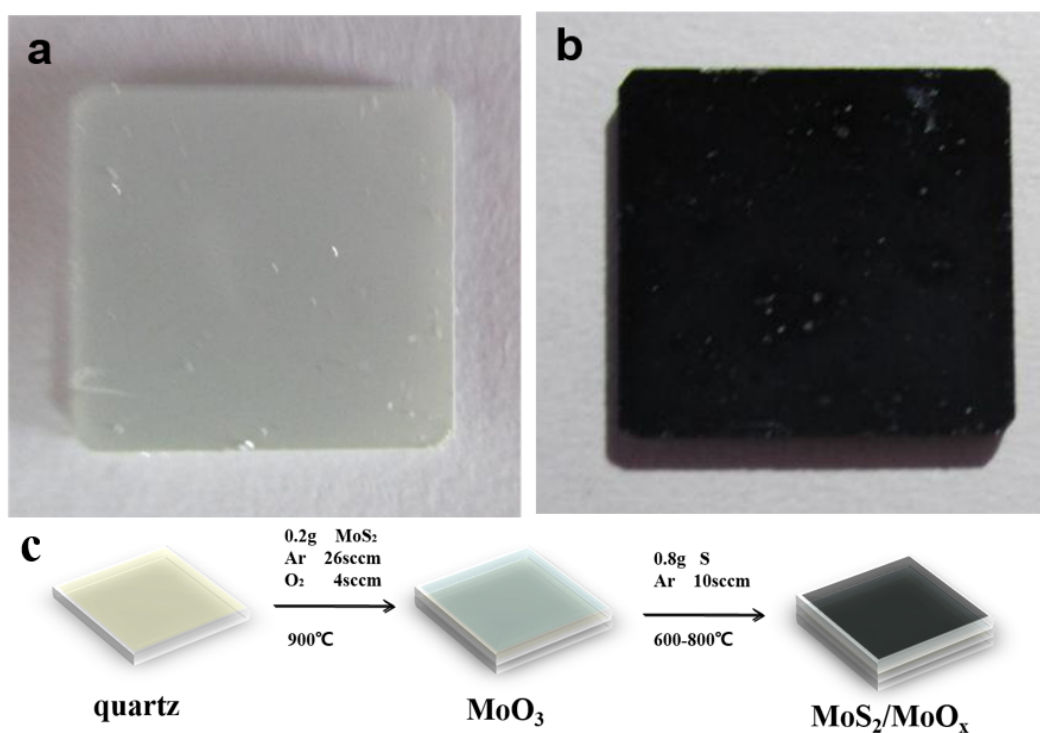

**Fig. S2** Digital photographs of (a) MoO<sub>3</sub> and (b) MSO1 before and after the sulfidization. (c) Schematic illustration for the construction of MSO heterojunction.

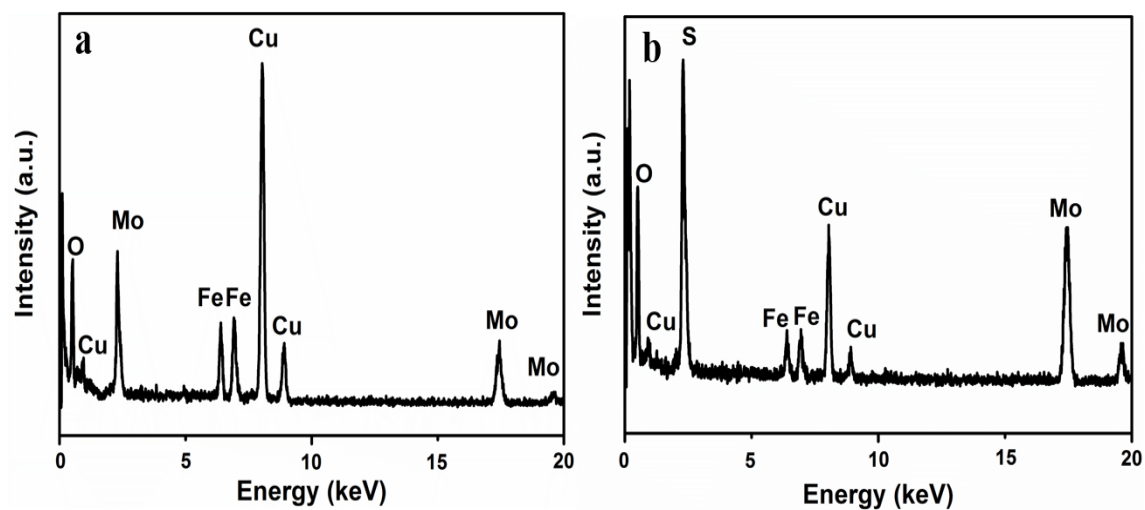

**Fig. S3** EDS spectra acquired from the whole area of (a) MoO<sub>3</sub> and (b) MSO1 before and after the sulfidization.

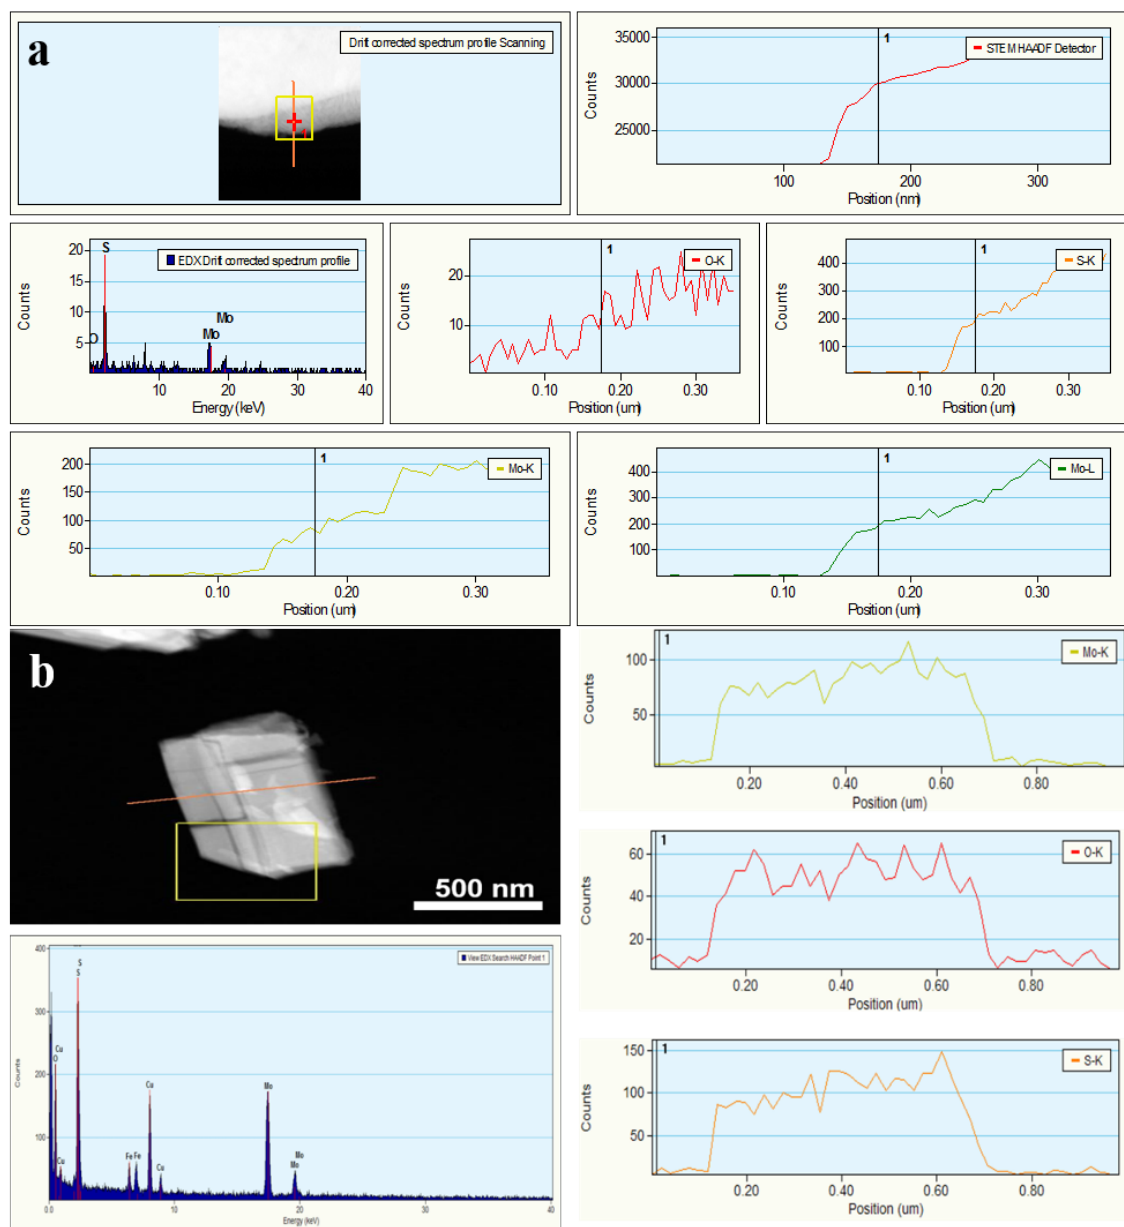

**Fig. S4** The line-sweeping EDS spectra acquired from (a) the edge and (b) the surface areas of MSO1 after the sulfidization.

| PH=7<br>Time (min) | MoO <sub>3</sub> | MSO <sub>1</sub> | MSO <sub>2</sub> | MSO <sub>3</sub> | TiO <sub>2</sub> | Blank |
|--------------------|------------------|------------------|------------------|------------------|------------------|-------|
| 0                  | 0.356            | 0.356            | 0.356            | 0.356            | 0.356            | 0.356 |
| 30                 | 0.289            | 0.091            | 0.108            | 0.117            | 0.301            | 0.352 |
| 60                 | 0.231            | 0.035            | 0.049            | 0.061            | 0.264            | 0.350 |
| 90                 | 0.203            | 0.021            | 0.035            | 0.041            | 0.227            | 0.349 |
| 120                | 0.184            | 0.011            | 0.021            | 0.028            | 0.211            | 0.349 |

**Table S1** The absorbance intensities of RhB aqueous solution at its typical wavelength of 553 nm with the illumination time for different photocatalysts.

**a**

| PH \ Time (min) | 2     | 5     | 7     | 9     | 12    |
|-----------------|-------|-------|-------|-------|-------|
| 0               | 0.317 | 0.334 | 0.356 | 0.378 | 0.393 |
| 30              | 0.310 | 0.294 | 0.289 | 0.347 | 0.379 |
| 60              | 0.274 | 0.251 | 0.231 | 0.321 | 0.367 |
| 90              | 0.249 | 0.227 | 0.203 | 0.314 | 0.351 |
| 120             | 0.247 | 0.224 | 0.184 | 0.308 | 0.349 |

**b**

| PH \ Time (min) | 2     | 5     | 7     | 9     | 12    |
|-----------------|-------|-------|-------|-------|-------|
| 0               | 0.317 | 0.334 | 0.356 | 0.378 | 0.393 |
| 30              | 0.126 | 0.117 | 0.091 | 0.197 | 0.214 |
| 60              | 0.097 | 0.090 | 0.035 | 0.149 | 0.171 |
| 90              | 0.058 | 0.051 | 0.021 | 0.109 | 0.121 |
| 120             | 0.031 | 0.025 | 0.011 | 0.087 | 0.119 |

**Table S2** The absorbance intensities of RhB aqueous solution at its typical wavelength of 553 nm with the illumination time at different PH values for (a) MoO<sub>3</sub> and (b) MSO1 before and after the sulfidization.

| Repeat times \ Time (min) | 0     | 1     | 2     | 3     | 4     |
|---------------------------|-------|-------|-------|-------|-------|
| 120                       | 0.011 | 0.018 | 0.020 | 0.033 | 0.038 |

**Table S3** The absorbance intensities of RhB aqueous solution at its typical wavelength of 553 nm after the illumination of 120 min in five sequential recycles for MSO1 after the sulfidization.

## Reference

- 1 S. Phadungdhithidhada, P. Mangkorntong, S. Choopun, N. Mangkorntong and D. Wongratanaphisan, *Mater. Lett.* 2011, **65**, 568.
- 2 Z. R. Dai, Z. W. Pan and Z. L. Wang, *Adv. Funct. Mater.* 2003, **13**, 9.
